# Supplementary material
Source: PubMed Central journal article supplement (PMC1201621)

**a***bcd*<sup>WT</sup> (1x)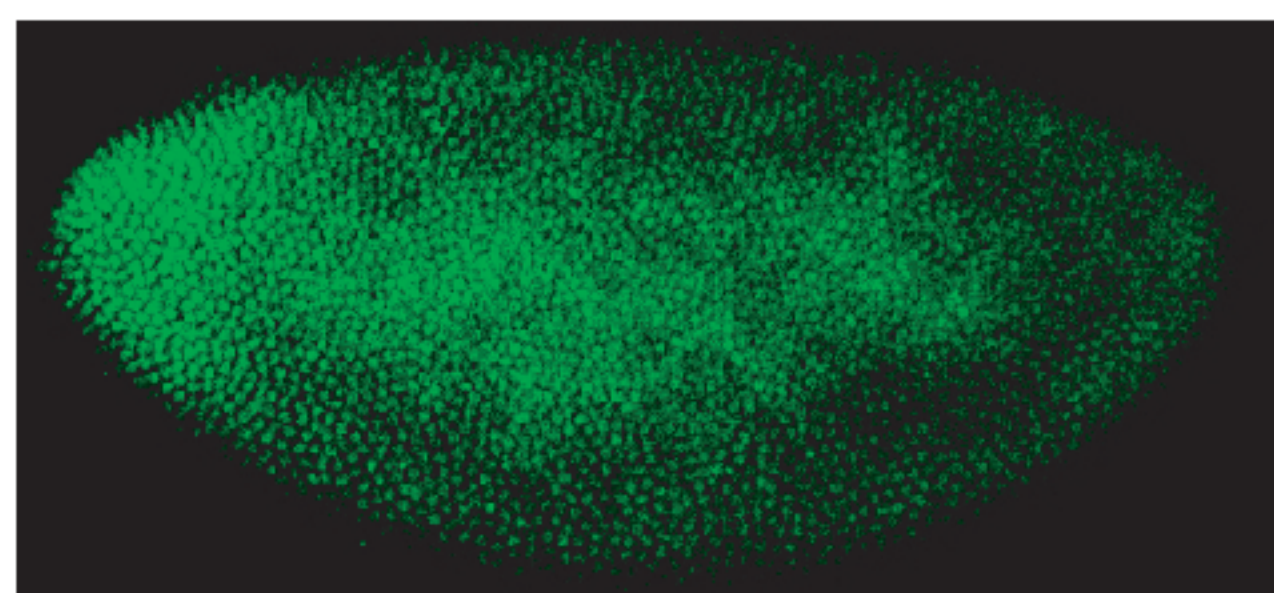**Bcd**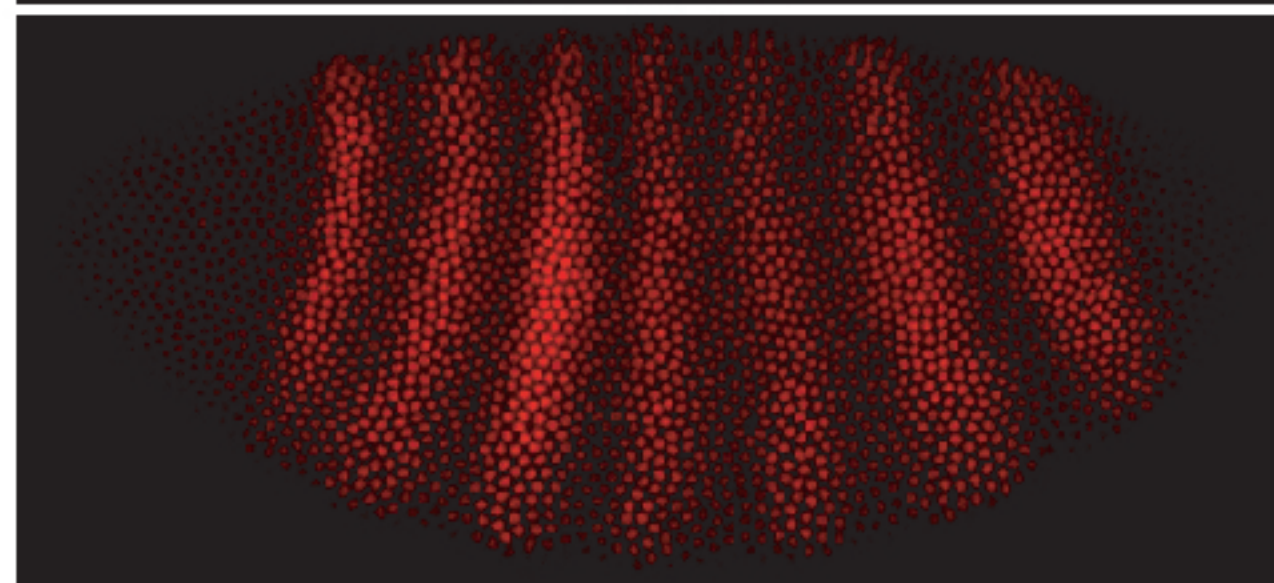**Eve**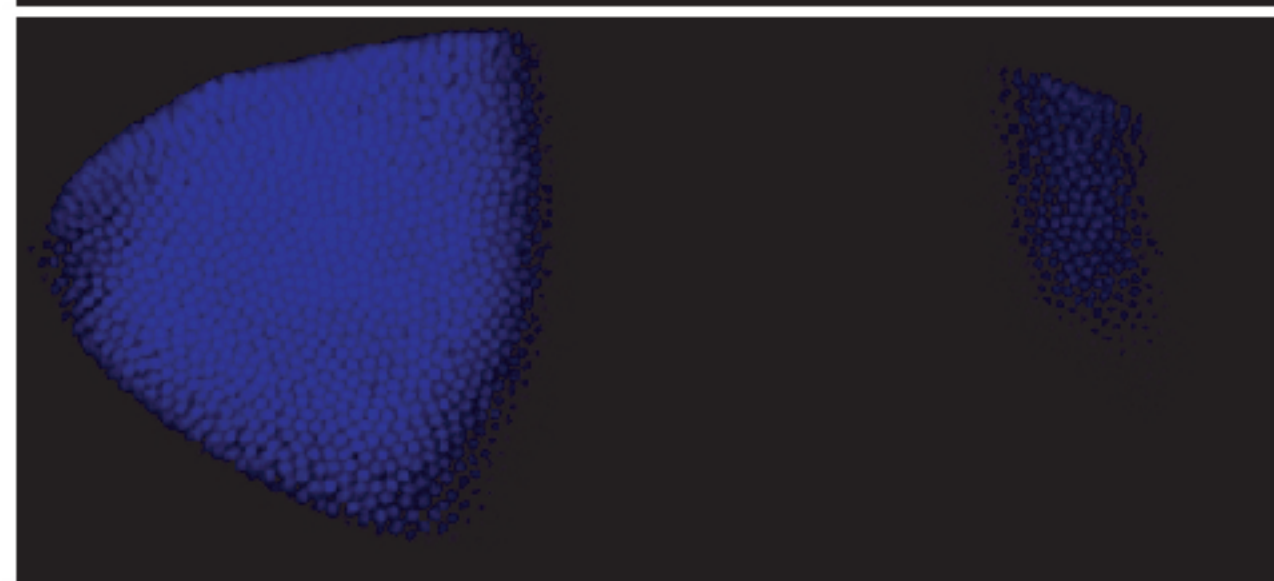**Hb****b**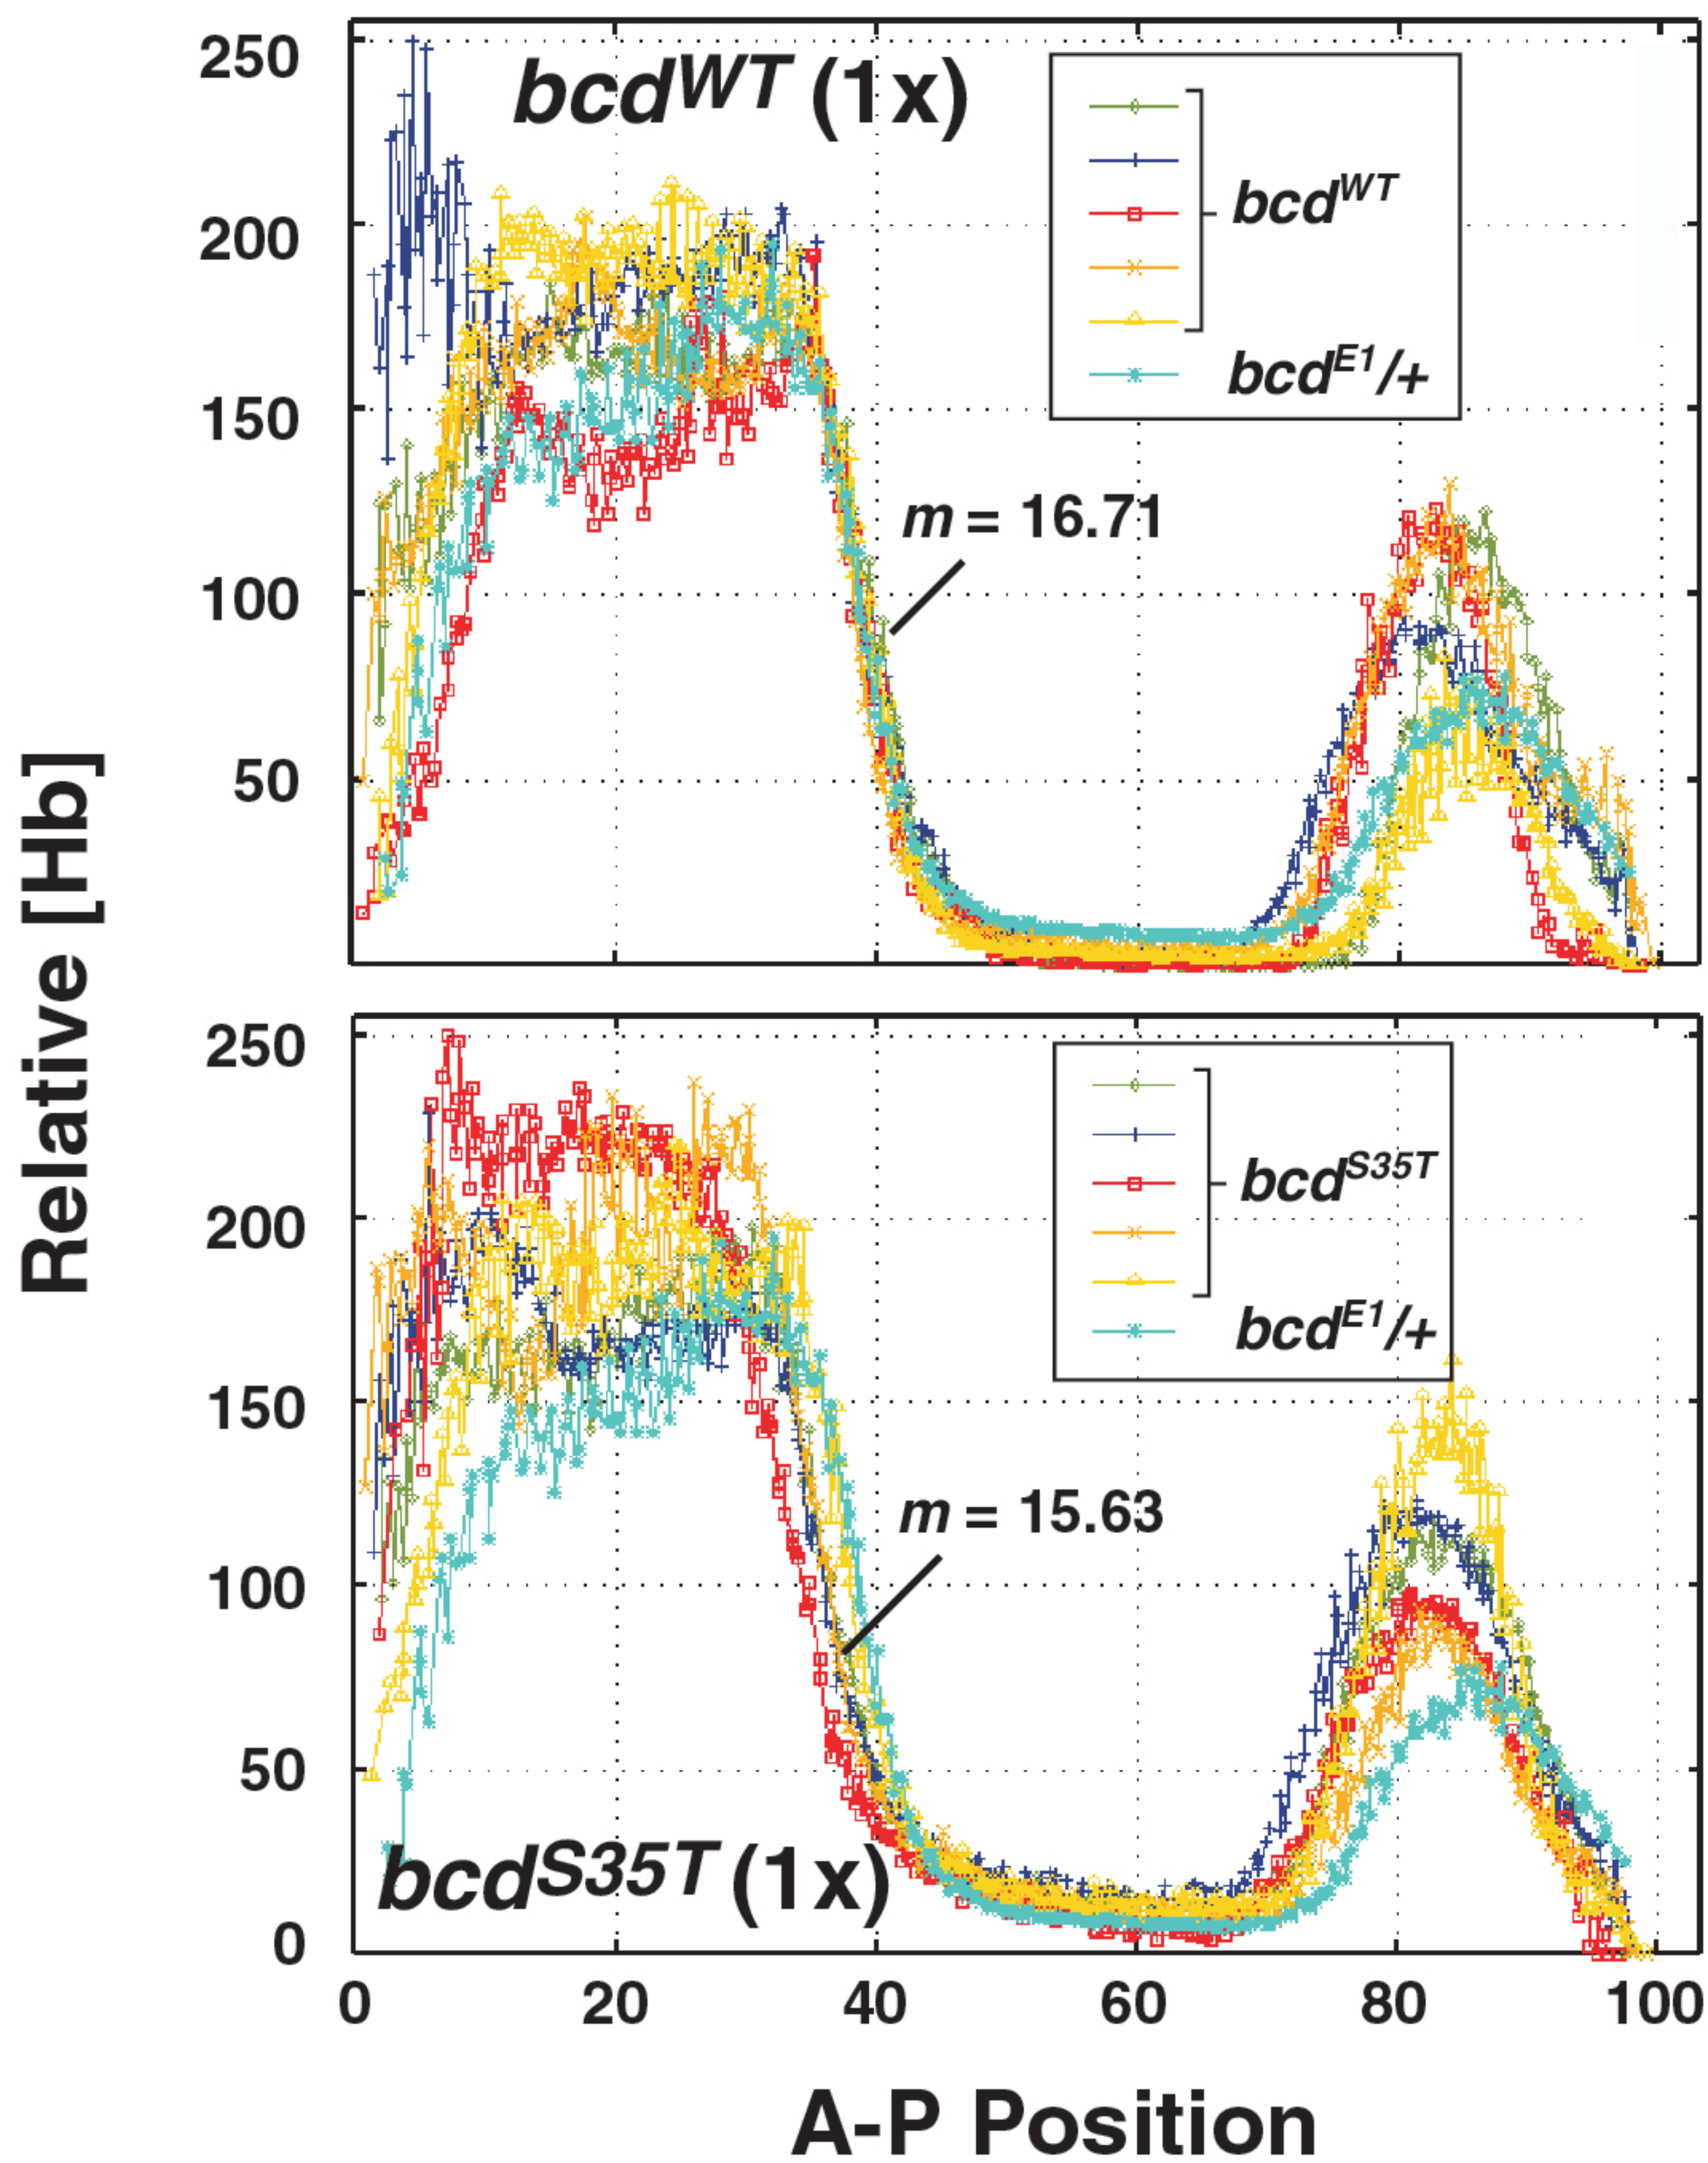

Supplement: pnas_0506462102_1.pdf [file pnas_0506462102_1.pdf]
